# Supplementary material for: Ion Mobility-Tandem Mass Spectrometry of Mucin-type O-Glycans
Source: Research Square preprint supplement (doi:10.21203/rs.3.rs-3499199/v1), 2023-11-14
Supplement: Supplementary file 1 [file 60a52b585d258af071bcdee8.xlsx]

## Sheet: Data_PGM
O-glycans in Porcine Gastric Mucins
Glycan code	m/z	z	MW in Da	PGC RT (min) N=2	STDEV	TWIMSCCS (Å²) N=2	STDEV	TIMSCCS (Å²) N=3	STDEV	AVERAGE CCS TIMS/TWIMS	STDEV	Composition	Structure type	Core	Chain type	Blood group	Putative structure (from TIMS-MS2)
530-1	530.206	1	531.206	15.645	0.00203386	206.996	0.00252862	207.844	0.00293161	207.42	0.00289092	Hex1HexNAc1dHex1	Branched	Peeling (1)			Fucα1-2(GalNAcα1-3)Galol
530-2	530.206	1	531.206	25.525	0.000692563	209.059	0.00285932	209.928	0.00183029	209.493	0.00293596	Hex1HexNAc1dHex1	Linear	1			Fucα1-2Galβ1-3GalNAcol
587-1	587.227	1	588.227	14.285	0.000742499	214.603	0.00258246	215.977	0.00307017	215.29	0.0045123	Hex1HexNAc2	Linear	1			GlcNAcα1-4Galβ1-3GalNAcol
587-2	587.227	1	588.227	13.78	0.00102628	232.53	0.00280885	233.211	0.00121016	232.87	0.00206681	Hex1HexNAc2	Branched	2			Galβ1-3(GlcNAcβ1-6)GalNAcol
667-1	667.184	1	668.184	14.655	0.00265376	226.224	0.00191139	226.908	0.00177989	226.566	0.00213261	Hex1HexNAc2S1	Branched	2			Galβ1-3(6SGlcNAcβ1-6)GalNAcol
667-2	667.184	1	668.184	15.46	0.00274427	233.447	0.000265808	234.754	0.000647895	234.101	0.00394729	Hex1HexNAc2S1	Linear	3	2		Galβ1-4(6S)GlcNAcβ1-3GalNAcol
675-1	675.243	1	676.243	13.285	0.00452421	245.248	0.0012066	245.621	0.00143812	245.434	0.00107491	Neu5Ac1Hex1HexNAc1	Branched	1			Galβ1-3(NeuAcα2-6)GalNAcol
675-2	675.243	1	676.243	15.125	0.00584386	248.986	0.00180199	249.379	0.00141301	249.182	0.0011158	Neu5Ac1Hex1HexNAc1	Linear	1			NeuAcα2-3Galβ1-3GalNAcol
733-1	733.286	1	734.286	25.935	0.00095426	245.429	0.00305234	246.562	0.000673321	245.995	0.00325793	Hex1HexNAc2dHex1	Branched	2			Fucα1-2Galβ1-3(GlcNAcβ1-6)GalNAcol
733-2	733.286	1	734.286	17.87	0.00118708	254.922	0.00238963	255.883	0.0024149	255.402	0.00266082	Hex1HexNAc2dHex1	Branched	1			GalNAcα1-3(Fucα1-2)Galβ1-3GalNAcol
749-1	749.281	1	750.281	15.88	0.000890563	243.818	0.00226152	244.513	0.00180062	244.165	0.00201315	Hex2HexNAc2	Linear	Peeling (1)	2		GlcNAcα1-4Galβ1-4GlcNAcβ1-3Galol
749-2	749.281	1	750.281	16.36	0.00172887	246.346	0.00143645	247.091	0.000965842	246.718	0.00213486	Hex2HexNAc2	Branched	2	2		Galβ1-3(Galβ1-4GlcNAcβ1-6)GalNAcol
749-3	749.281	1	750.281	16.97	0.00125004	279.177	0.00140494	279.991	0.00164565	279.584	0.00205826	Hex2HexNAc2	Linear	1	2		Galβ1-4GlcNAcβ1-3Galβ1-3GalNAcol
790-1	790.308	1	791.308	16.15	0.00218919	252.858	0.00539383	252.723	0.000911711	252.791	0.000377838	Hex1HexNAc3	Branched	2			Galβ1-3(GalNAcβ1-4GlcNAcβ1-6)GalNAcol
790-2	790.308	1	791.308	16.15	0.00218919	264.897	0.00230256	265.597	0.00173594	265.247	0.00186549	Hex1HexNAc3	Branched	2			Galβ1-3(GalNAcβ1-4GlcNAcβ1-6)GalNAcol
790-3	790.308	1	791.308	16.15	0.00218919	290.028	0.00115354	290.283	0.00144526	290.155	0.000622958	Hex1HexNAc3	Linear	1			GalNAcβ1-4GlcNAcβ1-3Galβ1-3GalNAcol
813-1	813.244	1	814.244	26.03	0.00353146	253.883	0.00316384	254.872	0.00138489	254.378	0.00274933	Hex1HexNAc2dHex1S1	Branched	2			Fucα1-2Galβ1-3(6SGlcNAcβ1-6)GalNAcol
878-1	878.324	1	879.324	15.705	0.00472755	274.088	0.00180618	274.354	0.0014352	274.221	0.000685564	Neu5Ac1Hex1HexNAc2	Branched	1			GlcNAcα1-4Galβ1-3(NeuAcα2-6)GalNAcol
895-1	895.34	1	896.34	26.025	0.000679257	273.053	0.00271503	273.327	0.0015559	273.19	0.000709832	Hex2HexNAc2dHex1	Branched	2	2		Fucα1-2Galβ1-3(Galβ1-4GlcNAcβ1-6)GalNAcol
895-2	895.34	1	896.34	20.69	0.000341763	275.927	0.00305564	275.3	0.00122616	275.613	0.00160745	Hex2HexNAc2dHex1	Branched	2	2	H	Galβ1-3(Fucα1-2Galβ1-4GlcNAcβ1-6)GalNAcol
895-3	895.34	1	896.34	19.725	0.00268862	290.183	0.00199507	290.256	0.0017128	290.22	0.00017746	Hex2HexNAc2dHex1	Linear	1	2	H	Fucα1-2Galβ1-4GlcNAcβ1-6Galβ1-3GalNAcol
895-4	895.34	1	896.34	18.03	0.00274528	297.614	0.00229695	296.616	0.00186966	297.115	0.00237674	Hex2HexNAc2dHex1	Linear	1	1	H	Fucα1-2Galβ1-3GlcNAcβ1-6Galβ1-3GalNAcol
936-1	936.367	1	937.367	26.01	0.00027186	285.451	0.00247246	285.702	0.00337904	285.577	0.000622382	Hex1HexNAc3dHex1	Branched	2			Fucα1-2Galβ1-3(GalNAcβ1-4GlcNAcβ1-6)GalNAcol
936-2	936.367	1	937.367	18.64	0.00227609	287.376	0.00201314	288.713	0.00382116	288.045	0.00328194	Hex1HexNAc3dHex1	Branched	2	2	A	GalNAcα1-3(Fucα1-2)Galβ1-3(GlcNAcβ1-6)GalNAcol
952-1	952.361	1	953.361	17.77	0.00119376	276.366	0.00148719	280.18	0.00080614	278.273	0.00969181	Hex2HexNAc3	Branched	2	2		Galβ1-3(GlcNAcα1-4Galβ1-3/4GlcNAcβ1-6)GalNAcol
952-2	952.361	1	953.361	17.77	0.00119376	282.168	0.000344817	285.318	0.0018331	283.743	0.00785024	Hex2HexNAc3	Branched	2	2		GlcNAcα1-4Galβ1-3(Galβ1-3/4GlcNAcβ1-6)GalNAcol
952-3	952.361	1	953.361	17.43	0.00283979	294.717	0.00253812	294.597	0.00204512	294.657	0.000287358	Hex2HexNAc3	Linear	1	2		GlcNAcα1-4Galβ1-4GlcNAcβ1-3Galβ1-3GalNAcol
975-1	975.298	1	976.298	-		-		286.728	0.012981	286.728		Hex2HexNAc2dHex1S1	Branched	2	2	H	Galβ1-3(Fucα1-2Galβ1-4(6S)GlcNAcβ1-6)GalNAcol
975-2	975.298	1	976.298	17.25	0.00204958	303.053	0.00123623	301.816	0.00142113	302.435	0.00289353	Hex2HexNAc2dHex1S1	Linear	1	2	H	Fucα1-2Galβ1-4(6S)GlcNAcβ1-3Galβ1-3GalNAcol
993-1	993.387	1	994.387	17.23	0.00287275	295.438	0.00241797	295.116	0.00218412	295.277	0.000771008	Hex1HexNAc4	Branched	2			GlcNAcα1-4Galβ1-3(GalNAcβ1-4GlcNAcβ1-6)GalNAcol
1040-1	1040.38	1	1041.38	17.7	0	292.038	0.00167302	291.148	0.00212392	291.593	0.00215713	Neu5Ac1Hex2HexNAc2	Linear	1	2		NeuAcα2-3/6Galβ1-3/4GlcNAcβ1-3/6Galβ1-3GalNAcol
1041-1	1041.4	1	1042.4	27.295	0.00012953	298.594	0.00247731	298.447	0.00284174	298.52	0.000348258	Hex2HexNAc2dHex2	Branched	2	2	H	Fucα1-2Galβ1-3(Fucα1-2GalNAcβ1-4GlcNAcβ1-6)GalNAcol
1098-1	1098.42	1	1099.42	26.315	0.000403063	308.746	0.00267178	307.076	0.00370279	307.911	0.0038333	Hex2HexNAc3dHex1	Branched	2	2		Fucα1-2Galβ1-3(GlcNAcα1-4Galβ1-4GlcNAcβ1-6)GalNAcol
1098-2	1098.42	1	1099.42	21.84	0.0019426	311.267	0.00174521	310.105	0.00211235	310.686	0.00264468	Hex2HexNAc3dHex1	Branched	2	2	H	GlcNAcα1-4Galβ1-3(Fucα1-2Galβ1-4GlcNAcβ1-6)GalNAcol
1098-3	1098.42	1	1099.42	15.98	0.00088499	316.503	0.000964573	314.576	0.00153634	315.54	0.00431826	Hex2HexNAc3dHex1	Branched	2	2	A	Galβ1-3(GalNAcα1-3(Fucα1-2)Galβ1-4GlcNAcβ1-6)GalNAcol
1098-4	1098.42	1	1099.42	15.66	0.00180615	326.485	0.00174973	325.543	0.00355536	326.014	0.00204279	Hex2HexNAc3dHex1	Branched	1	2	A	GalNAcα1-3(Fucα1-2)Galβ1-4GlcNAcβ1-3/6Galβ1-3GalNAcol
1155-1	1155.44	1	1156.44	18.465	0.00134031	315.879	0.00256698	316.86	0.00212177	316.369	0.00219157	Hex2HexNAc4	Branched	2	2		GlcNAcα1-4Galβ1-3(GlcNAcα1-4Galβ1-4GlcNAcβ1-6)GalNAcol
1178-1	1178.38	1	1179.38	-		-		317.625		317.625		Hex2HexNAc3dHex1S1	Branched	2	2	H	GlcNAcα1-4Galβ1-3(Fucα1-2Galβ1-4(6S)GlcNAcβ1-6)GalNAcol
1178-2	1178.38	1	1179.38	-		-		339.242		339.242		Hex2HexNAc3dHex1S1	Branched	1	2	A	GalNAcα1-3(Fucα1-2)Galβ1-4(6S)GlcNAcβ1-3Galβ1-3GalNAcol
621-1	621.732	2	1245.46	-		-		348.979		348.979		Neu5Ac1Hex2HexNAc3	Branched	2	2	A	Fucα1-2Galβ1-3(GalNAcα1-3(Fucα1-2)Galβ1-4GlcNAcβ1-6)GalNAcol
650-1	650.241	2	1302.48	17.95	0.00157573	364.317	0.0036253	355.96	0.00274533	360.139	0.0164092	Hex2HexNAc4dHex1	Branched	2	2		GalNAcα1-3(Fucα1-2)Galβ1-3(GlcNAcα1-4Galβ1-4GlcNAcβ1-6)GalNAcol
650-2	650.241	2	1302.48	20.64	0.00205554	386.535	0.00232568	381.257	0.00133453	383.896	0.009721	Hex2HexNAc4dHex1	Branched	2	2	A	GlcNAcα1-4Galβ1-3(GalNAcα1-3(Fucα1-2)Galβ1-4GlcNAcβ1-6)GalNAcol
702-1	702.759	2	1407.52	23.44	0.00181	373.55	0.00370161	360.689		367.119	0.0247722	Hex3HexNAc3dHex2	Branched	1	2	H	Fucα1-2Galβ1-4GlcNAcβ1-3(Fucα1-2Galβ1-4GlcNAcβ1-6)Galβ1-3GalNAcol
702-2	702.759	2	1407.52	25.765	0.000960556	375.672	0.00391356	369.149	0.00219622	372.411	0.0123856	Hex3HexNAc3dHex2	Branched	2	2	H	Fucα1-2Galβ1-3(Fucα1-2Galβ1-4GlcNAcβ1-3Galβ1-4GlcNAcβ1-6)GalNAcol
702-3	702.759	2	1407.52	-		-		379.237		379.237		Hex3HexNAc3dHex2	Branched	2	2	H	Fucα1-2Galβ1-4GlcNAcβ1-3Galβ1-3(Fucα1-2Galβ1-4GlcNAcβ1-6)GalNAcol
723-1	723.272	2	1448.54	19.565	0.00126495	371.803	0.0024308	364.407	0.00271825	368.105	0.0142071	Hex2HexNAc4dHex2	Branched	2	2	A	GalNAcα1-3(Fucα1-2)Galβ1-3(GalNAcα1-3(Fucα1-2)Galβ1-4GlcNAcβ1-6)GalNAcol
804-1	804.299	2	1610.6	25.65	0.00137838	405.953	0.00442143	399.23		402.591	0.0118086	Hex3HexNAc4dHex2	Branched	2	2	H	Fucα1-2Galβ1-4GlcNAcβ1-3(Fucα1-2Galβ1-4GlcNAcβ1-6)Galβ1-3(GlcNAcβ1-6)GalNAcol
861-1	861.326	2	1724.65	20.45	0.00276619	410.508	0.00453096	400.854	0.00127768	405.681	0.016828	Hex3HexNAc6	Branched	4	2		GlcNAcα1-4Galβ1-4GlcNAcβ1-3(GlcNAcα1-4Galβ1-4GlcNAcβ1-3Galβ1-4GlcNAcβ1-6)GalNAcol
861-2	861.326	2	1724.65	20.045	0.00229294	420.965	0.00187051	411.454	0.00172945	416.209	0.016159	Hex3HexNAc6	Branched	4	2		GlcNAcα1-4Galβ1-4GlcNAcβ1-3Galβ1-4GlcNAcβ1-3(GlcNAcα1-4Galβ1-4GlcNAcβ1-6)GalNAcol

## Sheet: Data_Healthy_Sputum
O-glycans in healthy sputum
Glycan code	m/z	z	MW in Da	TIMSCCS (Å²)	Mobility Peak Area	Area Ratio (parts of ten of same m/z)	Composition	Structure type	Core	Chain type	Blood group	Putative structure (from TIMS-MS2)
530-1	530.207	1	531.207	211.189	182.718	10	Hex1HexNAc1dHex1	Linear	1			Fucα1-2Galβ1-3GalNAcol
587-1	587.227	1	588.227	217.199	355.018	8.16235	Hex1HexNAc2	Linear	3			Galβ1-3/4GlcNAcβ1-3GalNAcol
587-2	587.227	1	588.227	234.314	79.9278	1.83765	Hex1HexNAc2	Branched	2			Galβ1-3(GlcNAcβ1-6)GalNAcol
675-1	675.243	1	676.243	246.815	115.672	4.46341	Neu5Ac1Hex1HexNAc1	Branched	1			Galβ1-3(NeuAcα2-6)GalNAcol
675-2	675.243	1	676.243	250.601	143.484	5.53659	Neu5Ac1Hex1HexNAc1	Linear	1			NeuAcα2-3/6Galβ1-3GalNAcol
716-1	716.272	1	717.272	261.702	65.5108	10	Neu5Ac1HexNAc2	Branched	3			Glcβ1-3(NeuAcα2-6)GalNAcol
733-1	733.286	1	734.286	253.047	138.037	4.76614	Hex1HexNAc2dHex1	Linear	3	2	H	Fucα1-2Galβ1-4GlcNAcβ1-3GalNAcol
733-2	733.286	1	734.286	256.839	151.584	5.23386	Hex1HexNAc2dHex1	Linear	3	1	H	Fucα1-2Galβ1-3GlcNAcβ1-3GalNAcol
749-1	749.279	1	750.279	247.747	62.144	5.77591	Hex2HexNAc2	Branched	2	2		Galβ1-3(Galβ1-4GlcNAcβ1-6)GalNAcol
749-2	749.279	1	750.279	280.58	45.4477	4.22409	Hex2HexNAc2	Linear	1	2		Galβ1-4GlcNAcβ1-6Galβ1-3GalNAcol
790-1	790.309	1	791.309	253.658	38.7442	4.84894	Hex1HexNAc3	Branched	4			GlcNAcβ1-3(Galβ1-3/4GlcNAcβ1-6)GalNAcol or Galβ1-3/4GlcNAcβ1-3(GlcNAcβ1-6)GalNAcol
790-2	790.309	1	791.309	266.472	41.1582	5.15106	Hex1HexNAc3	Branched	4			GlcNAcβ1-3(Galβ1-3/4GlcNAcβ1-6)GalNAcol or Galβ1-3/4GlcNAcβ1-3(GlcNAcβ1-6)GalNAcol
813-1	813.243	1	814.243	255.665	140.682	10	Hex1HexNAc2dHex1S1	Branched	2			Fucα1-2Galβ1-3((6S)GlcNAcβ1-6)GalNAcol
878-1	878.324	1	879.324	275.301	87.1839	10	Neu5Ac1Hex1HexNAc2	Branched	3			Galβ1-3/4GlcNAcβ1-3(NeuAcα2-6)GalNAcol
895-1	895.34	1	896.34	274.028	36.8995	3.59957	Hex2HexNAc2dHex1	Branched	2			Galβ1-3(Fucα1-2Galβ1-3/4GlcNAcβ1-6)GalNAcol
895-2	895.34	1	896.34	275.459	29.8347	2.9104	Hex2HexNAc2dHex1	Branched	2			Fucα1-2Galβ1-3(Galβ1-3/4GlcNAcβ1-6)GalNAcol
895-3	895.34	1	896.34	290.536	35.7766	3.49003	Hex2HexNAc2dHex1	Linear	1	2		Fucα1-2Galβ1-4GlcNAcβ1-3/6Galβ1-3GalNAcol
975-1	975.297	1	976.297	277.739	74.3413	10	Hex2HexNAc2dHex1S1	Branched	2	2	H	Galβ1-3(Fucα1-2(3S)Galβ1-4GlcNAcβ1-6)GalNAcol
551-1	551.665	2	1105.33	312.336	12.7475	10	Neu5Ac1Hex1HexNAc2dHex1S1	Branched	3		H	Fucα1-2(3S)Galβ1-3/4GlcNAcβ1-3(NeuAcα2-6)GalNAcol
560-1	560.168	2	1122.34	334.132	24.5781	10	Hex2HexNAc2dHex2S1	Branched	1		H	Fucα1-2Galβ1-3(Fucα1-2(3/6S)Galβ1-3/4GlcNAcβ1-6)GalNAcol
588-1	588.682	2	1179.36	321.432	25.2238	6.25497	Hex2HexNAc3dHex2S1	Branched	4		H	(3/6S)Galβ1-3/4GlcNAcβ1-3(Fucα1-2Galβ1-3/4GlcNAcβ1-6)GalNAcol or Fucα1-2Galβ1-3/4GlcNAcβ1-3((3/6S)Galβ1-3/4GlcNAcβ1-6)GalNAcol
588-2	588.682	2	1179.36	325.9	15.1022	3.74503	Hex2HexNAc3dHex2S1	Branched	2		H	Fucα1-2Galβ1-3/4GlcNAcβ1-3/6(3/6S)Galβ1-3(GlcNAcβ1-6)GalNAcol
632-1	632.691	2	1267.38	337.694	59.5244	10	Neu5Ac1Hex2HexNAc2dHex1S1	Branched	2		Lewis a/x	NeuAcα2-3/6Galβ1-3(Galβ1-4(Fucα1-3)(6S)GlcNAcβ1-6)GalNAcol or NeuAcα2-3/6Galβ1-3(Galβ1-3(Fucα1-4)(6S)GlcNAcβ1-6)GalNAcol
738-1	738.259	2	1478.52	374.074	138.389	10	Neu5Ac2Hex2HexNAc2dHex1	Branched	2		Sialyl Lewis x	NeuAcα2-3/6Galβ1-3(NeuAcα2-3Galβ1-3/4(Fucα1-3)GlcNAcβ1-6)GalNAcol

## Sheet: Data_CF_Sputum
O-glycans in cystic fibosis sputum
Glycan code	m/z	z	MW in Da	TIMSCCS (Å²)	Mobility Peak Area	Area Ratio (parts of ten of same m/z)	Composition	Structure type	Core	Chain type	Blood group	Putative structure (from TIMS-MS2)
472-1	472.165	1	473.165	199.722	579.963	10	Neu5Ac1Hex1	Linear	Peeling			Neu5Acα1-3/6Galol
513-1	513.191	1	514.191	216.504	1215.25	10	Neu5Ac1HexNAc1	Linear	Sialyl-Tn			Neu5Acα1-6GalNAcol
530-1	530.206	1	531.206	209.093	305.602	5.58231	HexNAc1Hex1dHex1	Linear	Peeling			Galα1-3(Fucα1-2)Galol
530-2	530.206	1	531.206	211.422	241.845	4.41769	HexNAc1Hex1dHex1	Linear	1			Fucα1-2Galβ1-3GalNAcol
587-1	587.227	1	588.227	234.314	314.506	10	Hex1HexNAc2	Branched	2			Galβ1-3(GlcNAcβ1-6)GalNAcol
675-1	675.243	1	676.243	246.815	3037.94	6.41445	Neu5Ac1Hex1HexNAc1	Branched	1			Galβ1-3(NeuAcα2-6)GalNAcol
675-2	675.243	1	676.243	250.601	1698.15	3.58555	Neu5Ac1Hex1HexNAc1	Linear	1			NeuAcα2-3/6Galβ1-3GalNAcol
716-1	716.27	1	717.27	261.94	334.17	10	Neu5Ac1HexNAc2	Branched	3			Glcβ1-3(NeuAcα2-6)GalNAcol
733-1	733.285	1	734.285	256.839	752.19	10	Hex1HexNAc2dHex1	Linear	3	2	H	Fucα1-2Galβ1-4GlcNAcβ1-3GalNAcol
749-1	749.279	1	750.279	248.219	321.844	10	Hex2HexNAc2	Branched	2			Galβ1-3(Galβ1-3/4GlcNAcβ1-6)GalNAcol
821-2	821.302	1	822.302	272.016	434.446	10	Neu5Ac1Hex1HexNAc1dHex	Branched	1			Fucα1-2Galβ1-3(Neu5Acα1-6)GalNAcol
966-1	966.339	1	967.339	288.295	226.28	3.21057	Neu5Ac2Hex1HexNAc1	Branched	1			NeuAcα2-6Galβ1-3(NeuAcα2-6)GalNAcol
966-2	966.339	1	967.339	291.892	478.518	6.78943	Neu5Ac2Hex1HexNAc1	Branched	1			NeuAcα2-3Galβ1-3(NeuAcα2-6)GalNAcol
1040-1	1040.38	1	1041.38	291.12	289.395	3.12742	Neu5Ac1Hex2HexNAc2	Branched	1			Galβ1-3/4GlcNAcβ1-3/6Galβ1-3(NeuAcα2-6)GalNAcol
1040-2	1040.38	1	1041.38	300.487	375.632	4.05936	Neu5Ac1Hex2HexNAc2	Branched	2			Galβ1-3(NeuAcα2-3/6Galβ1-3/4GlcNAcβ1-6)GalNAcol
1040-3	1040.38	1	1041.38	306.027	260.32	2.81321	Neu5Ac1Hex2HexNAc2	Branched	2			NeuAcα2-3/6Galβ1-3(Galβ1-3/4GlcNAcβ1-6)GalNAcol
1098-1	1098.42	1	1099.42	304.852	65.9716	3.22843	Hex2HexNAc3dHex1	Branched	4		Lewis a/x	Galβ1-3/4(Fucα1-2)GalNAcα1-3(Galβ1-3/4GlcNAcβ1-6)GalNAcol
1098-2	1098.42	1	1099.42	314.505	138.374	6.77157	Hex2HexNAc3dHex1	Branched	2		A	Galβ1-3(GalNAcα1-3(Fucα1-2)Galβ1-3/4GlcNAcβ1-6)GalNAcol
592-1	592.711	2	1187.42	330.331	119.158	1.74855	Neu5Ac1Hex2HexNAc2dHex1	Branched	2		Lewis a/x	Galβ1-3(NeuAcα2-3/6Galβ1-3/4(Fucα1-3/4)GlcNAcβ1-6)GalNAcol
592-2	592.711	2	1187.42	345.119	339.641	4.98397	Neu5Ac1Hex2HexNAc2dHex1	Linear	1		Lewis a/x	NeuAcα2-3/6Galβ1-3/4(Fucα1-3/4)GlcNAcβ1-3/6Galβ1-3GalNAcol
592-3	592.711	2	1187.42	358.179	222.667	3.26747	Neu5Ac1Hex2HexNAc2dHex1	Linear	1		Lewis a/x	NeuAcα2-3/6Galβ1-3/4(Fucα1-3/4)GlcNAcβ1-3/6Galβ1-3GalNAcol
632-1	632.689	2	1267.38	337.694	636.877	10	Neu5Ac1Hex2HexNAc2dHex1S1	Branched	2		Lewis a/x	NeuAcα2-3/6Galβ1-3(Galβ1-3/4(Fucα1-3/4)(6S)GlcNAcβ1-6)GalNAcol
665-1	665.23	2	1332.46	350.526	2464.08	7.35764	Neu5Ac2Hex2HexNAc2	Branched	2			NeuAcα2-3/6Galβ1-3(NeuAcα2-3/6Galβ1-3/4GlcNAcβ1-3/6)GalNAcol
665-2	665.23	2	1332.46	354.576	884.93	2.64236	Neu5Ac2Hex2HexNAc2	Branched	1			NeuAcα2-3/6Galβ1-3/4GlcNAcβ1-3/6Galβ1-3(NeuAcα2-6)GalNAcol
738-1	738.259	2	1478.52	374.98	2792.28	10	Neu5Ac2Hex2HexNAc2dHex1	Branched	2		Lewis a/x	NeuAcα2-3/6Galβ1-3(NeuAcα2-3/6Galβ1-3/4(Fucα2-3/4)GlcNAcβ1-6)GalNAcol
